# Supplementary material
Source: PubMed Central journal article supplement (PMC9259204)
Supplement: 10-1055-s-0042-1751239-s210304cr.pdf [file 10-1055-s-0042-1751239-s210304cr.pdf]

## Supplementary Material

### A. Inpatient portal features

**Table A.1** Available bedside features and their descriptions

| Portal feature group | Description                                                                                 |
|----------------------|---------------------------------------------------------------------------------------------|
| MyChart Ambulatory   | Access the ambulatory patient portal through the bedside conduit                            |
| Dining on demand     | Order food from a predefined menu                                                           |
| Happening soon       | Review scheduled upcoming tests or procedures                                               |
| I would like         | Request one of several ancillary services                                                   |
| My health            | Review vital signs including blood pressure, heart rate, and temperature                    |
| Notes                | Record and review personal notes (audio and written)                                        |
| Secure messages      | Communicate with the care team                                                              |
| Taking care of me    | Review active members of the care team                                                      |
| To learn             | Access training materials through a link to an external health information content provider |
| Tutorial             | Access video tutorial on how to use MyChart Bedside                                         |

**Table A.2** Inpatient portal usage by feature group summarized by the median number of sessions and the overall proportion of patients that utilized the feature

| Portal feature group | Sessions, median (Q1, Q3) | Patient proportion, % |
|----------------------|---------------------------|-----------------------|
| MyChart ambulatory   | 2 (0, 4)                  | 72%                   |
| Dining on demand     | 10 (5, 20)                | 95%                   |
| Happening soon       | 19 (6, 61)                | 88%                   |
| I would like         | 0 (0, 0)                  | 12%                   |
| My health            | 1 (0, 14)                 | 54%                   |
| Notes                | 0 (0, 0)                  | 3%                    |
| Secure messages      | 2 (0, 4)                  | 71%                   |
| Taking care of me    | 2 (1, 5)                  | 77%                   |
| To learn             | 0 (0, 1)                  | 35%                   |
| Tutorial             | 6 (4, 10)                 | 100%                  |

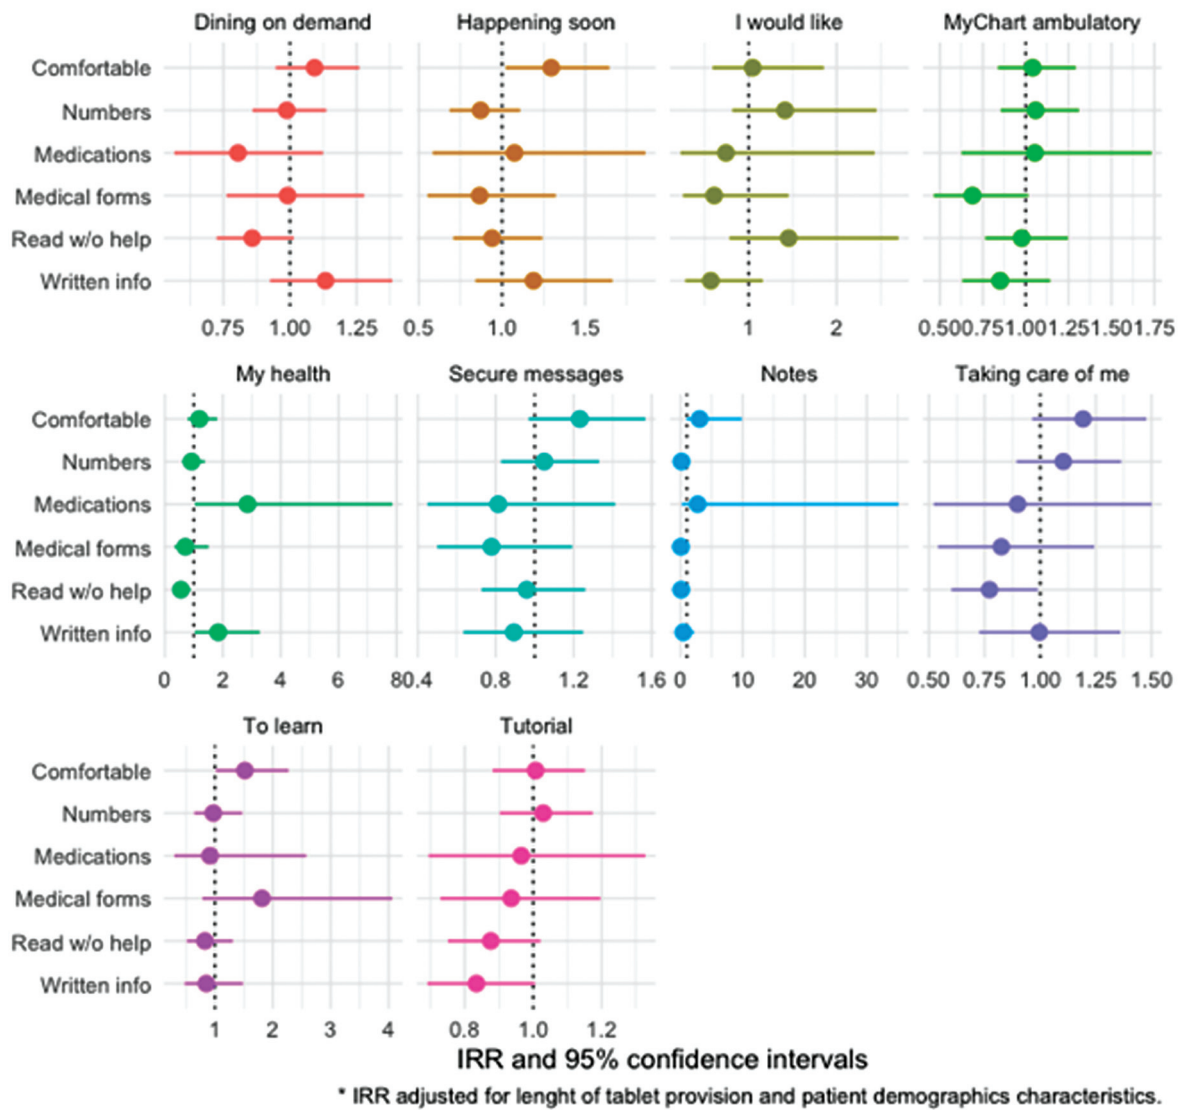

**Fig. A.1** Association between patient health literacy and numeracy skills and frequency of inpatient portal feature use modeled by negative binomial regressions.

Legend

|                     |                                                                                                          |
|---------------------|----------------------------------------------------------------------------------------------------------|
| Comfortable         | Disagree with the statement: "I feel uncomfortable with health information that has a lot of numbers"    |
| Numbers             | Agree with the statement: "I depend on numbers and statistics to help me make decisions about my health" |
| Medications         | Agree with the statement: "I know how to take my medications"                                            |
| Medical forms       | Agree with the statement: "I can fill out medical forms"                                                 |
| Read without help   | Disagree with the statement: "I frequently have someone help me read hospital material"                  |
| Written information | Disagree with the statement: "I frequently have difficulty using written health information"             |

## B. Outpatient Portal Features

**Table B.1** Available MyChart features and their descriptions

| Portal feature group | Description                                                                                                                                            |
|----------------------|--------------------------------------------------------------------------------------------------------------------------------------------------------|
| Messaging            | Links to messaging center, letters to the patient, prescription refill option                                                                          |
| Visits               | List of past and upcoming visits                                                                                                                       |
| My record            | List of medications, allergies; medical history, immunizations; test results and health summary; and preventive care and a summary of the plan of care |
| Medical tools        | Share medical records with other services; participate in research studies; and connect tracking devices                                               |
| Billing              | Account summary and payment                                                                                                                            |
| Resources            | Terms and conditions; patient education; and frequently asked questions                                                                                |
| Proxy                | Request or renew proxy                                                                                                                                 |
| Preferences          | Personal and security settings; and notification preferences                                                                                           |
| Custom               | Miscellaneous (e.g., send document to personal health record)                                                                                          |

**Table B.2** Outpatient portal usage by feature group summarized by the median number of sessions and the overall proportion of patients that utilized the feature

| Portal feature group | Sessions, median (Q1, Q3) | Patient proportion, % |
|----------------------|---------------------------|-----------------------|
| Messaging            | 2 (0, 15)                 | 61%                   |
| Visits               | 1 (0, 7)                  | 58%                   |
| My record            | 3 (0, 13)                 | 64%                   |
| Medical tools        | 0 (0, 0)                  | 18%                   |
| Billing              | 0 (0, 4)                  | 49%                   |
| Resources            | 0 (0, 0)                  | 0%                    |
| Proxy                | 0 (0, 0)                  | 12%                   |
| Preferences          | 0 (0, 1)                  | 33%                   |
| Custom               | 0 (0, 0)                  | 15%                   |

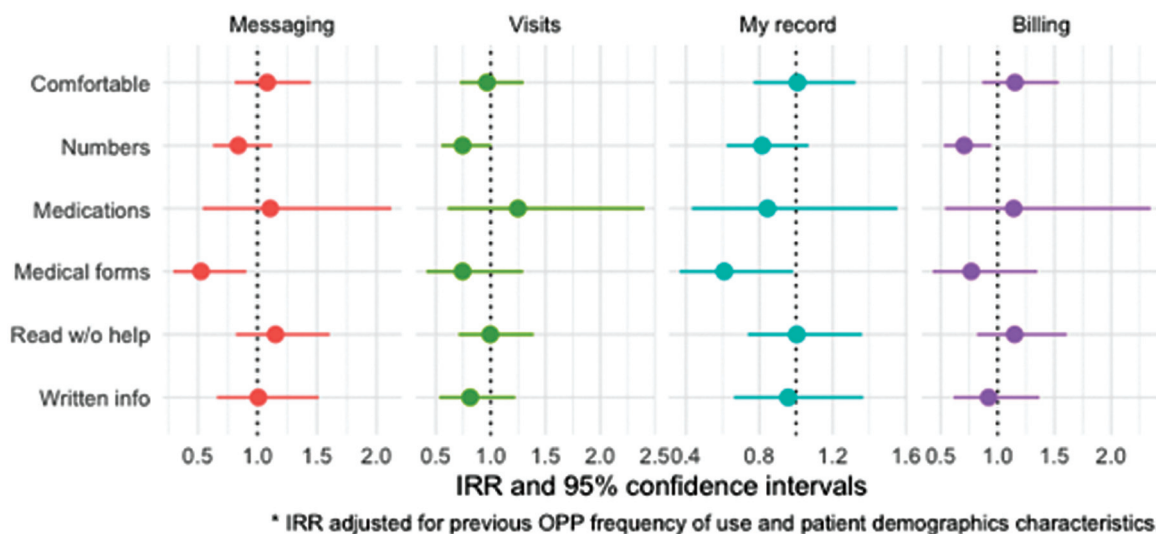

**Fig. B.1** Association between patient health literacy and numeracy skills and frequency of outpatient portal feature use modeled by negative binomial regressions. Results limited to the four functions use by approx. 50% of the patients.

Legend

|                     |                                                                                                          |
|---------------------|----------------------------------------------------------------------------------------------------------|
| Comfortable         | Disagree with the statement: "I feel uncomfortable with health information that has a lot of numbers"    |
| Numbers             | Agree with the statement: "I depend on numbers and statistics to help me make decisions about my health" |
| Medications         | Agree with the statement: "I know how to take my medications"                                            |
| Medical forms       | Agree with the statement: "I can fill out medical forms"                                                 |
| Read without help   | Disagree with the statement: "I frequently have someone help me read hospital material"                  |
| Written information | Disagree with the statement: "I frequently have difficulty using written health information"             |

C. Sensitivity Analysis

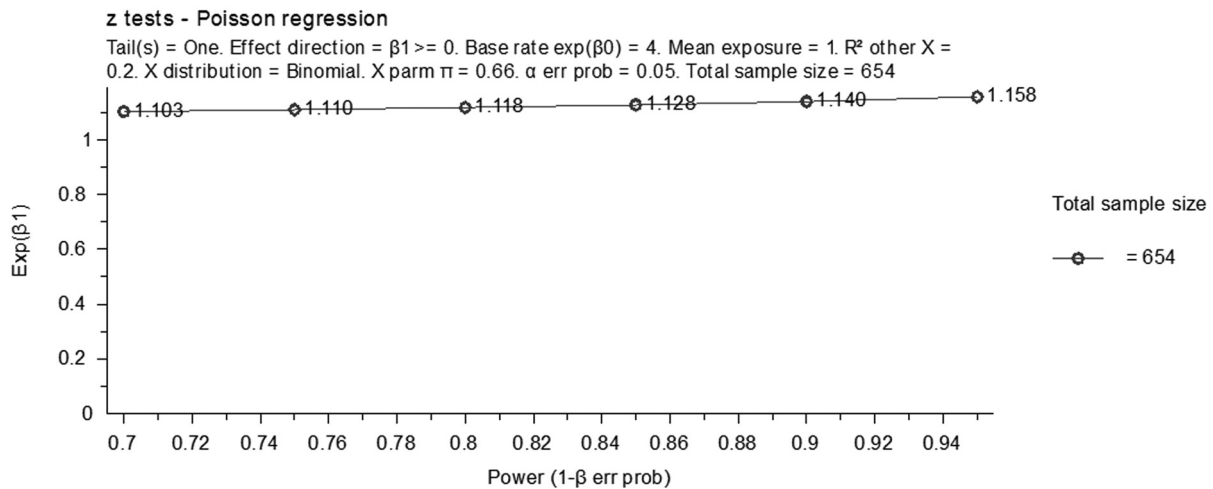

**Fig. C.1** Detectable effect size based on total sample size corresponding to an increase in inpatient portal session counts associated with higher health literacy and numeracy skills.

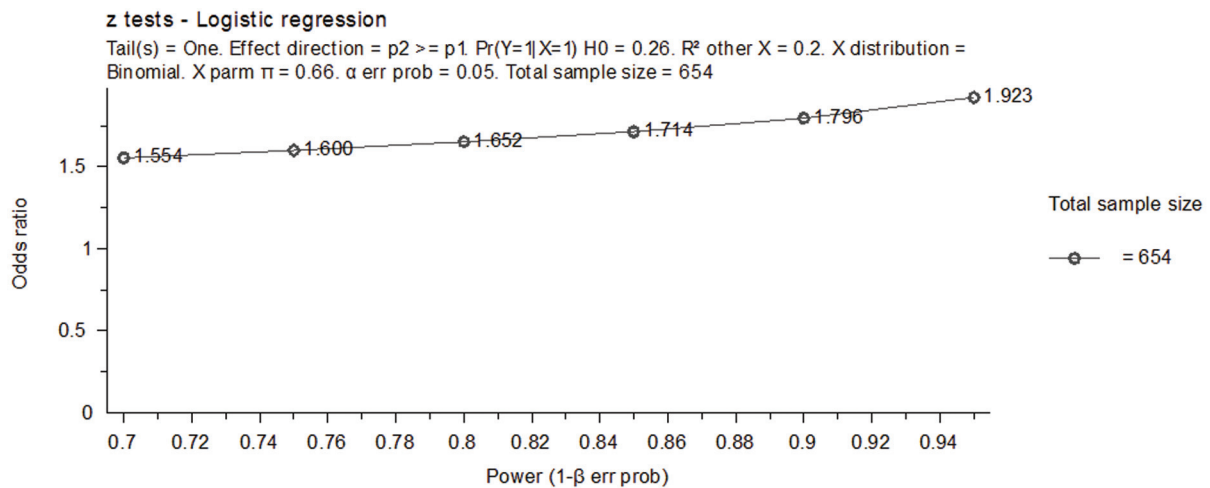

**Fig. C.2** Detectable effect size based on total sample size corresponding to the likelihood of comprehensive inpatient portal use associated with higher health literacy and numeracy skills.

**Table C.1** Inpatient portal (IPP) frequency and comprehensiveness of use, negative binomial and logistic regression models, showing incidence rate and odds ratios, with 95% confidence intervals, for all predictors and covariates

| Variable                                                                            | IPP frequency of use |            | IPP comprehensiveness of use |            |
|-------------------------------------------------------------------------------------|----------------------|------------|------------------------------|------------|
|                                                                                     | IRR                  | 95% CI     | OR                           | 95% CI     |
| <i>I feel uncomfortable with health information that has a lot of numbers</i>       |                      |            |                              |            |
| Strongly agree to neutral                                                           | –                    | –          | –                            | –          |
| Somewhat to strongly disagree                                                       | 1.13 <sup>a</sup>    | 1.01, 1.28 | 1.27                         | 0.83, 1.95 |
| <i>I depend on numbers and statistics to help me make decisions about my health</i> |                      |            |                              |            |
| Strongly disagree to neutral                                                        | –                    | –          | –                            | –          |
| Somewhat to strongly agree                                                          | 1.01                 | 0.89, 1.13 | 1.26                         | 0.83, 1.91 |
| <i>I know how to take my medications</i>                                            |                      |            |                              |            |
| Strongly disagree to neutral                                                        | –                    | –          | –                            | –          |
| Somewhat to strongly agree                                                          | 0.88                 | 0.65, 1.16 | 1.20                         | 0.44, 3.59 |
| <i>I can fill out medical forms</i>                                                 |                      |            |                              |            |
| Strongly disagree to neutral                                                        | –                    | –          | –                            | –          |
| Somewhat to strongly agree                                                          | 0.98                 | 0.79, 1.21 | 1.12                         | 0.52, 2.51 |
| <i>I frequently have someone help me read hospital material</i>                     |                      |            |                              |            |
| Strongly agree to neutral                                                           | –                    | –          | –                            | –          |
| Somewhat to strongly disagree                                                       | 0.94                 | 0.82, 1.08 | 0.88                         | 0.55, 1.43 |
| <i>I frequently have difficulty using written health information</i>                |                      |            |                              |            |
| Strongly agree to neutral                                                           | –                    | –          | –                            | –          |
| Somewhat to strongly disagree                                                       | 1.02                 | 0.86, 1.21 | 0.94                         | 0.53, 1.71 |
| Charlson score                                                                      | 0.98                 | 0.95, 1.01 | 0.96                         | 0.86, 1.07 |
| <i>Age</i>                                                                          |                      |            |                              |            |
| 18–29                                                                               | –                    | –          | –                            | –          |
| 30–39                                                                               | 0.94                 | 0.78, 1.13 | 1.02                         | 0.52, 2.03 |
| 40–49                                                                               | 0.96                 | 0.78, 1.17 | 1.48                         | 0.72, 3.06 |
| 50–59                                                                               | 0.81                 | 0.66, 1.00 | 1.09                         | 0.51, 2.33 |
| 60–69                                                                               | 0.89                 | 0.70, 1.13 | 0.95                         | 0.39, 2.28 |
| ≥70                                                                                 | 0.67 <sup>a</sup>    | 0.47, 0.97 | 0.64                         | 0.16, 2.38 |
| <i>Gender</i>                                                                       |                      |            |                              |            |
| Male                                                                                | –                    | –          | –                            | –          |
| Female                                                                              | 1.02                 | 0.90, 1.14 | 1.32                         | 0.87, 2.00 |
| <i>Race</i>                                                                         |                      |            |                              |            |
| White                                                                               | –                    | –          | –                            | –          |
| Black                                                                               | 0.91                 | 0.78, 1.06 | 0.86                         | 0.49, 1.48 |
| Other                                                                               | 0.84                 | 0.64, 1.13 | 0.86                         | 0.32, 2.17 |
| <i>Educational attainment</i>                                                       |                      |            |                              |            |
| Less than high school                                                               | –                    | –          | –                            | –          |
| High school                                                                         | 1.09                 | 0.83, 1.41 | 0.74                         | 0.30, 1.87 |
| Some college                                                                        | 1.24                 | 0.95, 1.61 | 1.11                         | 0.46, 2.79 |
| College graduate                                                                    | 1.31                 | 0.98, 1.73 | 1.48                         | 0.58, 3.91 |
| Graduate or beyond                                                                  | 1.26                 | 0.91, 1.74 | 1.34                         | 0.45, 4.07 |
| <i>Marital status</i>                                                               |                      |            |                              |            |
| Married                                                                             | –                    | –          | –                            | –          |

**Table C.1** (Continued)

| Variable                                    | IPP frequency of use |            | IPP comprehensiveness of use |            |
|---------------------------------------------|----------------------|------------|------------------------------|------------|
|                                             | IRR                  | 95% CI     | OR                           | 95% CI     |
| Living as married                           | 1.16                 | 0.91, 1.50 | 1.41                         | 0.57, 3.28 |
| Widowed                                     | 0.99                 | 0.83, 1.18 | 1.42                         | 0.78, 2.54 |
| Divorced                                    | 0.88                 | 0.65, 1.22 | 1.29                         | 0.44, 3.44 |
| Separated                                   | 1.03                 | 0.74, 1.48 | 1.86                         | 0.61, 5.43 |
| Single, never married                       | 1.00                 | 0.85, 1.18 | 0.94                         | 0.52, 1.69 |
| <i>Employment</i>                           |                      |            |                              |            |
| Employed                                    | –                    | –          | –                            | –          |
| Unemployed                                  | 1.24 <sup>a</sup>    | 1.01, 1.53 | 1.22                         | 0.59, 2.48 |
| Homemaker                                   | 1.10                 | 0.79, 1.56 | 0.74                         | 0.20, 2.31 |
| Student                                     | 1.03                 | 0.64, 1.73 | 1.52                         | 0.21, 8.84 |
| Retired                                     | 1.21                 | 0.96, 1.52 | 1.64                         | 0.72, 3.73 |
| Disabled                                    | 1.13                 | 0.96, 1.34 | 1.07                         | 0.59, 1.90 |
| Other                                       | 1.15                 | 0.85, 1.59 | 0.93                         | 0.29, 2.72 |
| <i>Household income</i>                     |                      |            |                              |            |
| \$0–\$19,999                                | –                    | –          | –                            | –          |
| \$20,000–\$49,999                           | 1.05                 | 0.90, 1.23 | 0.81                         | 0.46, 1.41 |
| \$50,000–\$99,999                           | 1.12                 | 0.94, 1.34 | 0.73                         | 0.39, 1.35 |
| \$100,000–\$199,999                         | 1.16                 | 0.93, 1.44 | 0.77                         | 0.35, 1.64 |
| \$200,000 or more                           | 1.01                 | 0.70, 1.49 | 1.27                         | 0.35, 4.39 |
| <i>General health</i>                       |                      |            |                              |            |
| Excellent                                   | –                    | –          | –                            | –          |
| Very good                                   | 1.22                 | 0.85, 1.72 | 2.59                         | 0.62, 18.0 |
| Good                                        | 1.36                 | 0.97, 1.88 | 2.79                         | 0.70, 18.9 |
| Fair                                        | 1.33                 | 0.94, 1.85 | 3.09                         | 0.76, 21.2 |
| Poor                                        | 1.13                 | 0.78, 1.63 | 2.30                         | 0.51, 16.6 |
| <i>Have you ever used a patient portal?</i> |                      |            |                              |            |
| Yes                                         | –                    | –          | –                            | –          |
| No                                          | 1.09                 | 0.94, 1.26 | 1.21                         | 0.73, 2.01 |
| I don't know                                | 1.25                 | 0.98, 1.60 | 1.29                         | 0.52, 2.97 |
| No. Obs.                                    | 654                  |            | 654                          |            |

Abbreviations: CI, confidence interval; IRR, incidence rate ratio; OR, odds ratio.

<sup>a</sup> $p < 0.05$ .<sup>b</sup> $p < 0.01$ .<sup>c</sup> $p < 0.001$ .

## D. Imputation of Missing Values

**Table D.1** Patient demographic characteristics, summary statistics of patient portals use, and dichotomized survey items representing patient health literacy and numeracy skills. Summaries are reported for all available patients, including missing values

| Characteristic                | <i>n</i> = 718 <sup>a</sup> |
|-------------------------------|-----------------------------|
| <i>Age</i>                    |                             |
| 18–29                         | 109 (15.2%)                 |
| 30–39                         | 152 (21.2%)                 |
| 40–49                         | 140 (19.5%)                 |
| 50–59                         | 162 (22.6%)                 |
| 60–69                         | 121 (16.9%)                 |
| ≥70                           | 34 (4.7%)                   |
| <i>Gender</i>                 |                             |
| Male                          | 276 (38.4%)                 |
| Female                        | 442 (61.6%)                 |
| <i>Race</i>                   |                             |
| White                         | 566 (78.8%)                 |
| Black                         | 122 (17.0%)                 |
| Other                         | 30 (4.2%)                   |
| <i>Educational attainment</i> |                             |
| Less than high school         | 38 (5.3%)                   |
| High school                   | 185 (25.8%)                 |
| Some college                  | 226 (31.6%)                 |
| College graduate              | 186 (26.0%)                 |
| Graduate or beyond            | 81 (11.3%)                  |
| (Missing)                     | 2                           |
| <i>Marital status</i>         |                             |
| Married                       | 352 (49.3%)                 |
| Living as married             | 37 (5.2%)                   |
| Widowed                       | 103 (14.4%)                 |
| Divorced                      | 26 (3.6%)                   |
| Separated                     | 24 (3.4%)                   |
| Single, never married         | 172 (24.1%)                 |
| (Missing)                     | 4                           |
| <i>Employment</i>             |                             |
| Employed                      | 349 (48.9%)                 |
| Unemployed                    | 71 (10.0%)                  |
| Homemaker                     | 21 (2.9%)                   |
| Student                       | 9 (1.3%)                    |
| Retired                       | 81 (11.4%)                  |
| Disabled                      | 157 (22.0%)                 |

**Table D.1** (Continued)

| Characteristic                                                                      | <i>n</i> = 718 <sup>a</sup> |
|-------------------------------------------------------------------------------------|-----------------------------|
| Other                                                                               | 25 (3.5%)                   |
| (Missing)                                                                           | 5                           |
| <i>Household income</i>                                                             |                             |
| \$0–\$19,999                                                                        | 232 (34.7%)                 |
| \$20,000–\$49,999                                                                   | 162 (24.3%)                 |
| \$50,000–\$99,999                                                                   | 159 (23.8%)                 |
| \$100,000–\$199,999                                                                 | 95 (14.2%)                  |
| \$200,000 or more                                                                   | 20 (3.0%)                   |
| (Missing)                                                                           | 50                          |
| <i>General health</i>                                                               |                             |
| Excellent                                                                           | 25 (3.5%)                   |
| Very good                                                                           | 103 (14.3%)                 |
| Good                                                                                | 266 (37.0%)                 |
| Fair                                                                                | 245 (34.1%)                 |
| Poor                                                                                | 79 (11.0%)                  |
| <i>Have you ever used a patient portal?</i>                                         |                             |
| Yes                                                                                 | 527 (73.7%)                 |
| No                                                                                  | 150 (21.0%)                 |
| I don't know                                                                        | 38 (5.3%)                   |
| (Missing)                                                                           | 3                           |
| <i>Charlson score</i>                                                               | 1 (0, 2)                    |
| <i>Length of provision (days)</i>                                                   | 4 (3, 7)                    |
| <i>Count of IPP sessions in admission</i>                                           | 16 (9, 29)                  |
| <i>Comprehensive IPP use</i>                                                        | 195 (27.2%)                 |
| <i>Count of OPP sessions 6 month postdischarge</i>                                  | 10 (0, 46)                  |
| <i>I feel uncomfortable with health information that has a lot of numbers</i>       |                             |
| Strongly agree to neutral                                                           | 414 (58.1%)                 |
| Somewhat to strongly disagree                                                       | 299 (41.9%)                 |
| (Missing)                                                                           | 5                           |
| <i>I depend on numbers and statistics to help me make decisions about my health</i> |                             |
| Strongly disagree to neutral                                                        | 411 (57.7%)                 |
| Somewhat to strongly agree                                                          | 301 (42.3%)                 |
| (Missing)                                                                           | 6                           |
| <i>I know how to take my medications</i>                                            |                             |
| Strongly disagree to neutral                                                        | 31 (4.4%)                   |
| Somewhat to strongly agree                                                          | 678 (95.6%)                 |
| (Missing)                                                                           | 9                           |
| <i>I can fill out medical forms</i>                                                 |                             |

**Table D.1** (Continued)

| Characteristic                                                       | <i>n</i> = 718 <sup>a</sup> |
|----------------------------------------------------------------------|-----------------------------|
| Strongly disagree to neutral                                         | 65 (9.2%)                   |
| Somewhat to strongly agree                                           | 644 (90.8%)                 |
| (Missing)                                                            | 9                           |
| <i>I frequently have someone help me read hospital material</i>      |                             |
| Strongly agree to neutral                                            | 229 (32.3%)                 |
| Somewhat to strongly disagree                                        | 480 (67.7%)                 |
| (Missing)                                                            | 9                           |
| <i>I frequently have difficulty using written health information</i> |                             |
| Strongly agree to neutral                                            | 131 (18.5%)                 |
| Somewhat to strongly disagree                                        | 578 (81.5%)                 |
| (Missing)                                                            | 9                           |

<sup>a</sup>*n* (%).

Note: Median (Q1, Q3).

**Table D.2** Health literacy and numeracy skill levels by income reporting status

| Dichotomized HLN item                                                               | Household income                    |                                       | <i>p</i> -Value <sup>b</sup> |
|-------------------------------------------------------------------------------------|-------------------------------------|---------------------------------------|------------------------------|
|                                                                                     | Missing, <i>n</i> = 50 <sup>a</sup> | Reported, <i>n</i> = 668 <sup>a</sup> |                              |
| <i>I feel uncomfortable with health information that has a lot of numbers</i>       |                                     |                                       |                              |
| Strongly agree to neutral                                                           | 32 (65.3%)                          | 382 (57.5%)                           | 0.3                          |
| Somewhat to strongly disagree                                                       | 17 (34.7%)                          | 282 (42.5%)                           |                              |
| (Missing)                                                                           | 1                                   | 4                                     |                              |
| <i>I depend on numbers and statistics to help me make decisions about my health</i> |                                     |                                       |                              |
| Strongly disagree to neutral                                                        | 31 (64.6%)                          | 380 (57.2%)                           | 0.3                          |
| Somewhat to strongly agree                                                          | 17 (35.4%)                          | 284 (42.8%)                           |                              |
| (Missing)                                                                           | 2                                   | 4                                     |                              |
| <i>I know how to take my medications</i>                                            |                                     |                                       |                              |
| Strongly disagree to neutral                                                        | 2 (4.2%)                            | 29 (4.4%)                             | > 0.9                        |
| Somewhat to strongly agree                                                          | 46 (95.8%)                          | 632 (95.6%)                           |                              |
| (Missing)                                                                           | 2                                   | 7                                     |                              |
| <i>I can fill out medical forms</i>                                                 |                                     |                                       |                              |
| Strongly disagree to neutral                                                        | 5 (10.4%)                           | 60 (9.1%)                             | 0.8                          |
| Somewhat to strongly agree                                                          | 43 (89.6%)                          | 601 (90.9%)                           |                              |
| (Missing)                                                                           | 2                                   | 7                                     |                              |
| <i>I frequently have someone help me read hospital material</i>                     |                                     |                                       |                              |
| Strongly agree to neutral                                                           | 18 (37.5%)                          | 211 (31.9%)                           | 0.4                          |
| Somewhat to strongly disagree                                                       | 30 (62.5%)                          | 450 (68.1%)                           |                              |
| (Missing)                                                                           | 2                                   | 7                                     |                              |
| <i>I frequently have difficulty using written health information</i>                |                                     |                                       |                              |
| Strongly agree to neutral                                                           | 9 (18.8%)                           | 122 (18.5%)                           | > 0.9                        |
| Somewhat to strongly disagree                                                       | 39 (81.2%)                          | 539 (81.5%)                           |                              |
| (Missing)                                                                           | 2                                   | 7                                     |                              |

Abbreviation: HLN, health literacy and numeracy.

<sup>a</sup>*n* (%).

<sup>b</sup>Pearson's chi-square test; Fisher's exact test.



**Table D.3** Inpatient portal (IPP) and outpatient portal (OPP) frequency and comprehensiveness of use, negative binomial and logistic regression models, showing incidence rate and odds ratios, with 95% confidence intervals, for all predictors and covariates. Estimates computed on data with missing values imputed via fully conditional specification

| Variable                                                                            | IPP frequency of use |            | IPP comprehensive-ness of use |            | OPP frequency of use |            |
|-------------------------------------------------------------------------------------|----------------------|------------|-------------------------------|------------|----------------------|------------|
|                                                                                     | IRR                  | 95% CI     | OR                            | 95% CI     | IRR                  | 95% CI     |
| <i>I feel uncomfortable with health information that has a lot of numbers</i>       |                      |            |                               |            |                      |            |
| Strongly agree to neutral                                                           | –                    | –          | –                             | –          | –                    | –          |
| Somewhat to strongly disagree                                                       | 1.11                 | 0.99, 1.25 | 1.17                          | 0.78, 1.77 | 0.92                 | 0.69, 1.22 |
| <i>I depend on numbers and statistics to help me make decisions about my health</i> |                      |            |                               |            |                      |            |
| Strongly disagree to neutral                                                        | –                    | –          | –                             | –          | –                    | –          |
| Somewhat to strongly agree                                                          | 1.02                 | 0.91, 1.14 | 1.30                          | 0.88, 1.93 | 0.83                 | 0.63, 1.09 |
| <i>I know how to take my medications</i>                                            |                      |            |                               |            |                      |            |
| Strongly disagree to neutral                                                        | –                    | –          | –                             | –          | –                    | –          |
| Somewhat to strongly agree                                                          | 0.92                 | 0.70, 1.21 | 1.26                          | 0.46, 3.44 | 1.09                 | 0.55, 2.18 |
| <i>I can fill out medical forms</i>                                                 |                      |            |                               |            |                      |            |
| Strongly disagree to neutral                                                        | –                    | –          | –                             | –          | –                    | –          |
| Somewhat to strongly agree                                                          | 0.97                 | 0.79, 1.19 | 1.13                          | 0.54, 2.38 | 0.61                 | 0.37, 1.03 |
| <i>I frequently have someone help me read hospital material</i>                     |                      |            |                               |            |                      |            |
| Strongly agree to neutral                                                           | –                    | –          | –                             | –          | –                    | –          |
| Somewhat to strongly disagree                                                       | 0.95                 | 0.84, 1.08 | 0.88                          | 0.56, 1.39 | 0.88                 | 0.64, 1.21 |
| <i>I frequently have difficulty using written health information</i>                |                      |            |                               |            |                      |            |
| Strongly agree to neutral                                                           | –                    | –          | –                             | –          | –                    | –          |
| Somewhat to strongly disagree                                                       | 0.99                 | 0.85, 1.16 | 0.96                          | 0.55, 1.68 | 1.07                 | 0.73, 1.58 |
| Charlson score                                                                      | 0.97                 | 0.95, 1.00 | 0.95                          | 0.85, 1.05 | 1.06                 | 0.98, 1.13 |
| <i>Age</i>                                                                          |                      |            |                               |            |                      |            |
| 18–29                                                                               | –                    | –          | –                             | –          | –                    | –          |
| 30–39                                                                               | 0.98                 | 0.81, 1.17 | 1.16                          | 0.60, 2.24 | 1.09                 | 0.69, 1.72 |
| 40–49                                                                               | 0.99                 | 0.81, 1.20 | 1.57                          | 0.79, 3.14 | 0.84                 | 0.52, 1.37 |
| 50–59                                                                               | 0.87                 | 0.71, 1.06 | 1.18                          | 0.58, 2.43 | 1.05                 | 0.64, 1.73 |
| 60–69                                                                               | 0.94                 | 0.75, 1.18 | 0.83                          | 0.35, 1.95 | 1.28                 | 0.71, 2.28 |
| ≥70                                                                                 | 0.74                 | 0.53, 1.04 | 0.57                          | 0.16, 2.11 | 0.99                 | 0.42, 2.33 |
| <i>Gender</i>                                                                       |                      |            |                               |            |                      |            |
| Male                                                                                | –                    | –          | –                             | –          | –                    | –          |
| Female                                                                              | 1.06                 | 0.95, 1.18 | 1.40                          | 0.94, 2.08 | 1.21                 | 0.92, 1.59 |
| <i>Race</i>                                                                         |                      |            |                               |            |                      |            |
| White                                                                               | –                    | –          | –                             | –          | –                    | –          |
| Black                                                                               | 0.89                 | 0.77, 1.03 | 0.81                          | 0.48, 1.40 | 0.74                 | 0.52, 1.06 |
| Other                                                                               | 0.84                 | 0.65, 1.08 | 0.82                          | 0.34, 1.95 | 1.32                 | 0.69, 2.52 |
| <i>Educational attainment</i>                                                       |                      |            |                               |            |                      |            |
| Less than high school                                                               | –                    | –          | –                             | –          | –                    | –          |
| High school                                                                         | 1.07                 | 0.83, 1.37 | 0.72                          | 0.31, 1.69 | 1.01                 | 0.53, 1.91 |
| Some college                                                                        | 1.18                 | 0.92, 1.52 | 0.95                          | 0.41, 2.23 | 1.47                 | 0.78, 2.78 |
| College graduate                                                                    | 1.23                 | 0.95, 1.61 | 1.14                          | 0.46, 2.80 | 1.61                 | 0.82, 3.15 |
| Graduate or beyond                                                                  | 1.18                 | 0.87, 1.60 | 0.90                          | 0.32, 2.56 | 1.66                 | 0.78, 3.55 |

**Table D.3** (Continued)

| Variable                                    | IPP frequency of use |            | IPP comprehensive-ness of use |            | OPP frequency of use |            |
|---------------------------------------------|----------------------|------------|-------------------------------|------------|----------------------|------------|
|                                             | IRR                  | 95% CI     | OR                            | 95% CI     | IRR                  | 95% CI     |
| <i>Marital status</i>                       |                      |            |                               |            |                      |            |
| Married                                     | –                    | –          | –                             | –          | –                    | –          |
| Living as married                           | 1.13                 | 0.89, 1.44 | 1.16                          | 0.48, 2.77 | 0.65                 | 0.35, 1.18 |
| Widowed                                     | 1.02                 | 0.87, 1.20 | 1.47                          | 0.85, 2.56 | 0.66 <sup>a</sup>    | 0.45, 0.98 |
| Divorced                                    | 0.89                 | 0.67, 1.18 | 1.17                          | 0.43, 3.15 | 0.83                 | 0.41, 1.68 |
| Separated                                   | 1.03                 | 0.77, 1.39 | 2.09                          | 0.81, 5.36 | 0.64                 | 0.30, 1.38 |
| Single, never married                       | 1.00                 | 0.86, 1.17 | 0.87                          | 0.49, 1.56 | 0.95                 | 0.64, 1.42 |
| <i>Employment</i>                           |                      |            |                               |            |                      |            |
| Employed                                    | –                    | –          | –                             | –          | –                    | –          |
| Unemployed                                  | 1.25 <sup>a</sup>    | 1.02, 1.52 | 1.23                          | 0.61, 2.48 | 0.90                 | 0.55, 1.48 |
| Homemaker                                   | 1.27                 | 0.93, 1.73 | 0.83                          | 0.27, 2.48 | 0.45 <sup>a</sup>    | 0.20, 0.99 |
| Student                                     | 1.03                 | 0.63, 1.67 | 1.55                          | 0.25, 9.71 | 0.87                 | 0.26, 2.87 |
| Retired                                     | 1.19                 | 0.96, 1.48 | 1.88                          | 0.85, 4.16 | 0.82                 | 0.47, 1.43 |
| Disabled                                    | 1.11                 | 0.95, 1.30 | 1.19                          | 0.69, 2.05 | 0.80                 | 0.54, 1.17 |
| Other                                       | 1.15                 | 0.86, 1.53 | 1.00                          | 0.35, 2.83 | 0.55                 | 0.26, 1.15 |
| <i>Household income</i>                     |                      |            |                               |            |                      |            |
| \$0–\$19,999                                | –                    | –          | –                             | –          | –                    | –          |
| \$20,000–\$49,999                           | 1.04                 | 0.88, 1.23 | 0.86                          | 0.47, 1.55 | 1.34                 | 0.91, 1.98 |
| \$50,000–\$99,999                           | 1.11                 | 0.92, 1.33 | 0.79                          | 0.42, 1.48 | 1.91 <sup>b</sup>    | 1.25, 2.92 |
| \$100,000–\$199,999                         | 1.14                 | 0.91, 1.43 | 0.95                          | 0.42, 2.14 | 3.19 <sup>c</sup>    | 1.78, 5.70 |
| \$200,000 or more                           | 0.98                 | 0.68, 1.42 | 1.82                          | 0.53, 6.26 | 2.38                 | 0.92, 6.15 |
| <i>General health</i>                       |                      |            |                               |            |                      |            |
| Excellent                                   | –                    | –          | –                             | –          | –                    | –          |
| Very good                                   | 1.03                 | 0.75, 1.40 | 2.28                          | 0.58, 8.93 | 1.18                 | 0.52, 2.67 |
| Good                                        | 1.16                 | 0.86, 1.55 | 2.34                          | 0.62, 8.77 | 1.33                 | 0.60, 2.94 |
| Fair                                        | 1.12                 | 0.83, 1.51 | 2.85                          | 0.75, 10.8 | 1.70                 | 0.75, 3.87 |
| Poor                                        | 1.00                 | 0.72, 1.40 | 2.18                          | 0.53, 9.07 | 1.19                 | 0.49, 2.92 |
| <i>Have you ever used a patient portal?</i> |                      |            |                               |            |                      |            |
| Yes                                         | –                    | –          | –                             | –          | –                    | –          |
| No                                          | 1.07                 | 0.94, 1.23 | 1.07                          | 0.66, 1.73 | 0.30 <sup>c</sup>    | 0.21, 0.42 |
| I don't know                                | 1.20                 | 0.95, 1.52 | 1.21                          | 0.53, 2.77 | 0.67                 | 0.38, 1.20 |
| <i>OPP frequency of previous use (6 mo)</i> |                      |            |                               |            | 1.02 <sup>c</sup>    | 1.02, 1.02 |
| No. Obs.                                    | 718                  |            | 718                           |            | 718                  |            |

Abbreviations: CI, confidence interval; IRR, incidence rate ratio; OR, odds ratio.

<sup>a</sup> $p < 0.05$ .<sup>b</sup> $p < 0.01$ .<sup>c</sup> $p < 0.001$ .

## E. Postdischarge survey response

**Table E.1** Health literacy and numeracy and postdischarge survey response

| Dichotomized HLN item                                                               | Postdischarge survey                 |                                   | p-Value <sup>b</sup> |
|-------------------------------------------------------------------------------------|--------------------------------------|-----------------------------------|----------------------|
|                                                                                     | Nonrespondents, n = 390 <sup>a</sup> | Respondents, n = 264 <sup>a</sup> |                      |
| <i>I feel uncomfortable with health information that has a lot of numbers</i>       |                                      |                                   |                      |
| Strongly agree to neutral                                                           | 235 (60%)                            | 138 (52%)                         | 0.043                |
| Somewhat to strongly disagree                                                       | 155 (40%)                            | 126 (48%)                         |                      |
| <i>I depend on numbers and statistics to help me make decisions about my health</i> |                                      |                                   |                      |
| Strongly disagree to neutral                                                        | 230 (59%)                            | 145 (55%)                         | 0.3                  |
| Somewhat to strongly agree                                                          | 160 (41%)                            | 119 (45%)                         |                      |
| <i>I know how to take my medications</i>                                            |                                      |                                   |                      |
| Strongly disagree to neutral                                                        | 22 (5.6%)                            | 7 (2.7%)                          | 0.068                |
| Somewhat to strongly agree                                                          | 368 (94%)                            | 257 (97%)                         |                      |
| <i>I can fill out medical forms</i>                                                 |                                      |                                   |                      |
| Strongly disagree to neutral                                                        | 43 (11%)                             | 17 (6.4%)                         | 0.046                |
| Somewhat to strongly agree                                                          | 347 (89%)                            | 247 (94%)                         |                      |
| <i>I frequently have someone help me read hospital material</i>                     |                                      |                                   |                      |
| Strongly agree to neutral                                                           | 140 (36%)                            | 69 (26%)                          | 0.009                |
| Somewhat to strongly disagree                                                       | 250 (64%)                            | 195 (74%)                         |                      |
| <i>I frequently have difficulty using written health information</i>                |                                      |                                   |                      |
| Strongly agree to neutral                                                           | 79 (20%)                             | 43 (16%)                          | 0.2                  |
| Somewhat to strongly disagree                                                       | 311 (80%)                            | 221 (84%)                         |                      |

<sup>a</sup>n (%).

<sup>b</sup>Pearson's chi-square test.
